# Supplementary material for: Antiviral efficacy of short-hairpin RNAs and artificial microRNAs targeting foot-and-mouth disease virus
Source: PeerJ. 2021 Jun 9;9:e11227. doi: 10.7717/peerj.11227 (PMC8197037; doi:10.7717/peerj.11227)
Supplement: Supplemental Information 1 [file peerj-09-11227-s001.xlsx]

## Sheet: Figure 1
Raw data correspond to supplementary table 2

## Sheet: Figure 2
Median fluorescence values (shRNA)
Exp No.	neg	290	444	1055	1162
1	83	69.5	47.8	33.7	44.9
2	68.7	61.4	49	44.3	42.1
Median fluorescence values (amiRNA)
Exp No.	miRneg	290	444	1055	1162	1055-290	1055-1162	1055-444
1	76.9	50.18	38.83	51.3	52.1	45	65.1	38.5
2	76.9	44.29	40.4	63.5	66	39.5	45.4	36.6
3	94.1	37.42	35.1	54		43.4	60.6	41.6

## Sheet: Figure 3
Plaque diameter (mm)
290	1055	BHK-21	mirneg
4.156	4.959	6.653	5.254
4.266	2.629	7.006	5.705
3.006	4.612	6.741	4.463
3.926	5.42	2.975	4.691
4.404	5.156	7.006	5.951
2.939	3.261	4.223	6.301
3.006	4.267	5.705	7.359
4.509	3.927	6.208	5.829
2.776	3.927	6.505	4.621
4.266	4.51	5.705	5.412
5.576	3.459	5.364	7.438
4.124	2.446	4.564	7.438
4.124	4.51	4.223	5.254
4.156	4.959	5.601	6.176
5.155	2.777	4.691	5.026
4.863	4.125	4.114	6.941
4.266	3.591	5.601	4.908
3.114	3.876	5.519	6.301
4.863	3.261	5.254	5.364
4.611	4.864	5.254	2.909
4.863	4.612		7.359
3.458	4.125		5.026
2.654	4.125
4.611	5.156
5.077	3.927
4.156	3.115
3.114	3.115
4.266	3.591
4.124	2.777
3.59	3.361
2.445	3.006
4.863	2.306
3.114	3.591
3.753	4.51
4.863	3.754
4.509	2.126
5.307	2.939
5.077	5.156
3.59	6.013
4.509	2.446
4.509
Time=18h	290	1055	BHK	miRneg
	41418	456870	351360	515730
	111110	145680	515730	515731
Time=24h	290	1055	BHK	miRneg
	624820	1111100	4685500	515730
	1761000	701060	3513600	1761000
Time=48h	290	1055	BHK	miRneg
	27022000	14568000	41418000	43244000
	35136000	55390000	41418000	29808000

## Sheet: Figure 4 
Figure 4A
Time=18h	M5	M1	M3	miRneg	BHK
	35136	35136	41418	22170000	1975900
	549800	468550	35136	527100	4324400
Time=24h	M5	M1	M3	miRneg	BHK
	488220	456870	5157300	4141800	35136000
	515730	3694	3513600	5157300	29808000
Time=48h	M5	M1	M3	miRneg	BHK
	35136000	43244000	29808000	70106000	35136000
	16500000	35136000	35136	52167000	35136000
Figure 4B
Time=18h	M7	M8	M9	M12	miRneg	BHK
	351360	239380	189030	18903	1111100	2393800
	11111	111110	111110	351360	515730	3513600
Time=24h	M7	M8	M9	M12	miRneg	BHK
	515730	7569900	515730	351360	3307100	4512900
	351360	3513600	1111100	515730	8332200	6248200
Time=48h	M7	M8	M9	M12	miRneg	BHK
	11111000	2393800	4685500	7569900	1111100	1111100
	5157300	11111000	4685500	7569900	5157300	1111100

## Sheet: table 2
shRNA (time=5h)	neg	1162	1055	444	290
	11111000	17610000	4568700	2702200	11111000
	23938000	13988000	3513600	1761000	7010600
amiRNA (time=5h)	mirneg	290	444	1162	1055
	7569900	351360	1495500	7569900	1761000
	5157300	882590	570540	5568700	2311700

## Sheet: Suppl Figure 4
	Cell line	REF	REF	EFF REF	GEN INTE	GEN INTE	EFF GEN INTE
amiRNA 1055	1055 polyclonal	30.3679	29.635	1.83575	38.6827	39.2077	1.8511
	M5 1055	32.0117	31.3759	1.83575	36.6245	36.6167	1.8511
	M3 1055	30.6539	31.2361	1.83575	38.8399	39.2748	1.8511
	M1 1055	36.3711	36.0851	1.83575	37.6458	38.111	1.8511
amiRNA 290	290 polyclonal	26.38	26.49	1.91	30.42	30.6	1.92
	M8 290	28.66	28.51	1.91	31.83	30.98	1.92
	M9 290	26.04	25.63	1.91	34.15	35.89	1.92
	M12 290	27.63	27.68	1.91	33.12	33.06	1.92
amiRNA 1055	1055 polyclonal	25.603	24.726	1.716	31.753	30.253	1.766
	1055-290	28.817	28.319	1.716	34.461	31.869	1.766
	1055-1162	27.933	28.002	1.716	32.61	31.697	1.766
	1055-444	26.786	26.767	1.716	32.027	30.331	1.766
amiRNA 444	444 polyclonal	17.4	17.4	1.83	35.15	34.12	1.87
	1055-444	18.22	18.34	1.83	37.77	36.08	1.87
amiRNA 290	290 polyclonal	19.24	19.24	1.83	32.34	32.19	1.87
	1055-290	17.97	17.33	1.83	31.4	31.36	1.87
